# Supplementary material
Source: MDPI journal article supplement (https://www.mdpi.com/2673-866X/3/4/28)
Supplement: s1 [file s1]

Archive with 1 entries (1 files):
- traumacare-2658685-supplementary.pdf
